# Supplementary material
Source: Copernicus journal article supplement (doi:10.5194/bg-23-4343-2026)
Supplement: Supplementary file 1 [file bg-23-4343-2026-supplement.pdf]

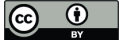

*Supplement of*

## **Quantification, spatial distribution and persistence of root-derived carbon for 12 crop species**

**Baptiste Hulin et al.**

*Correspondence to:* Baptiste Hulin ([baptiste.hulin@yahoo.com](mailto:baptiste.hulin@yahoo.com))

The copyright of individual parts of the supplement might differ from the article licence.

**Table S1.** Mean root decay rate constants (k) from literature reviews. % at day 524 is the % of dry mass remaining at day 524 calculated with the provided k ( $\% = e^{-k(524/365.25)}$ ).

| Functional Group  | Root Size | k    | % at Day 524 | Study                 |
|-------------------|-----------|------|--------------|-----------------------|
| Graminoids        | All       | 1.49 | 12           | Silver and Miya, 2001 |
| Graminoids        | <5mm      | 1.27 | 16           | Zhang and Wang, 2015  |
| Annual Graminoids | <2mm      | 1.24 | 17           | See et al., 2019      |
| Annual Forbs      | <2mm      | 3.5  | 1            | See et al., 2019      |

**Table S2.** Plant density (number of plants per mesocosm); seeds sown per mesocosm and recommended number of seeds to sow per mesocosm according to technical institutes.

| <i>Species</i>            | Plant density | Seeds sown | Recommended seed number |
|---------------------------|---------------|------------|-------------------------|
| <i>Medicago sativa</i>    | 9,8,1         | 64         | 32                      |
| <i>Vicia sativa</i>       | 4,4,4         | 6          | 3                       |
| <i>Trifolium pratense</i> | 4,7,4         | 43         | 22                      |
| <i>Vicia faba</i>         | 1,1,1         | 2          | 1                       |
| <i>Hordeum vulgare</i>    | 5,5,5         | 9          | 5                       |
| <i>Lolium multiflorum</i> | 11,17,3       | 45         | 23                      |
| <i>Secale cereale</i>     | 5,5,5         | 10         | 5                       |
| <i>Avena sativa</i>       | 6,6,5         | 7          | 4                       |
| <i>Sinapis alba</i>       | 2,1           | 6          | 3                       |
| <i>Camelina sativa</i>    | 3,3,3         | 14         | 7                       |
| <i>Brassica napus</i>     | 5,4,5         | 10         | 5                       |
| <i>Raphanus sativus</i>   | 2,2,2         | 3          | 2                       |

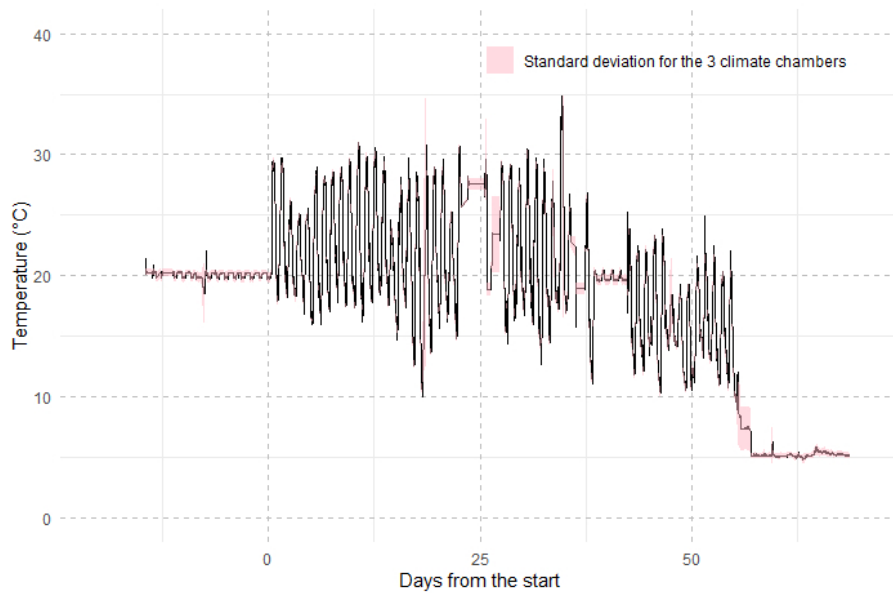

**Figure S1.** Mean temperature of the three climate chambers. Day 0 indicates the start of the climate simulation. Before the start, temperature was set to 20°C to ensure optimal seed emergence conditions. After harvest, temperature was set to 4°C to restrict mesocosms evolution while sampling.

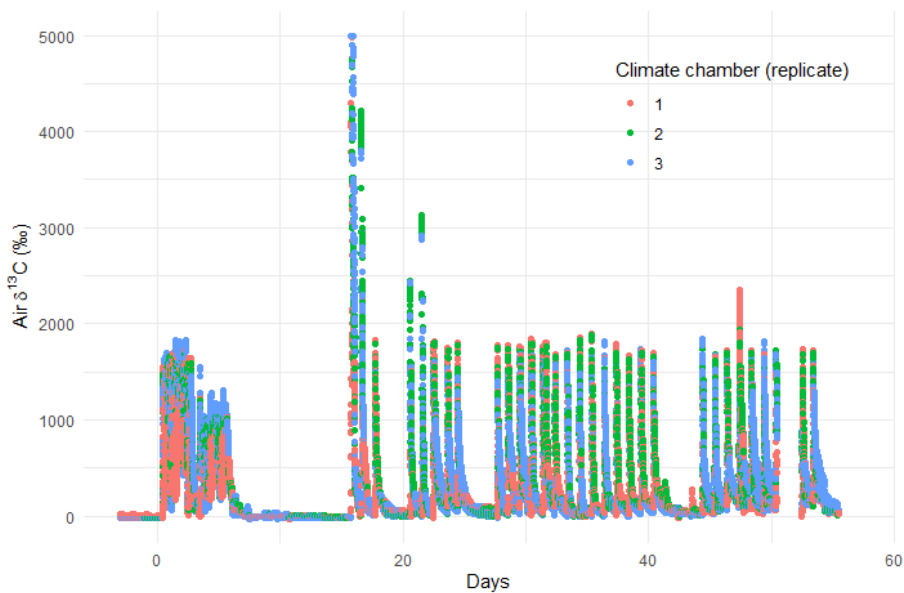

**Figure S2.** Isotopic signature of the  $^{13}\text{C}$ -CO<sub>2</sub> enriched air in the three climate chambers. Day 0 indicates the start of the climate simulation.

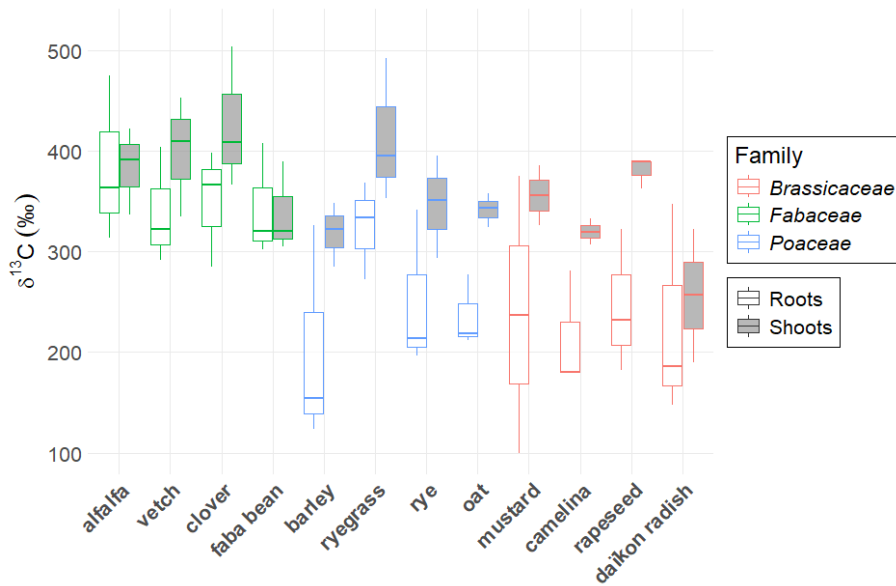

**Figure S3.** Isotopic signature of belowground (blank boxes) and aboveground (plain boxes) plant material for the 12 plants. The horizontal lines of the boxes display the 75<sup>th</sup>, the 50<sup>th</sup> and the 25<sup>th</sup> percentiles. The vertical lines in the centre of the boxes display the smallest and largest values within 1.5 times the interquartile range below the 25<sup>th</sup> and the 75<sup>th</sup> percentile respectively.

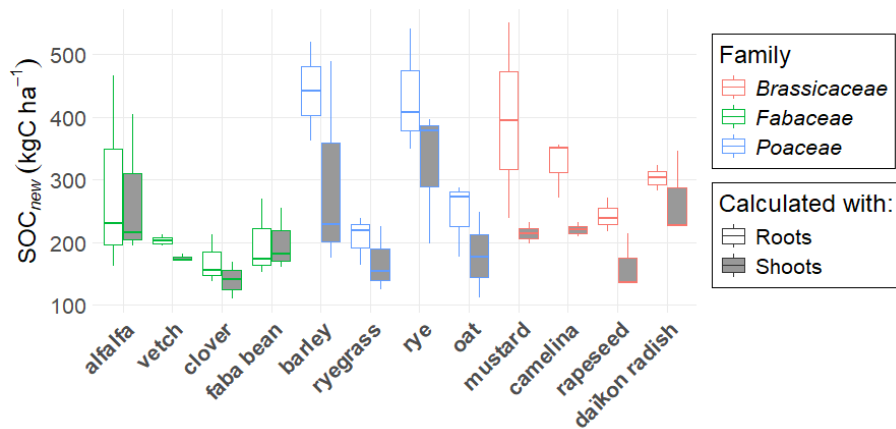

**Figure S4.** Comparison of  $\text{SOC}_{\text{new}}$  values calculated with the isotopic signature of roots (blank boxes) and shoots (plain boxes) as the plant end-member. The horizontal lines of the boxes display the 75<sup>th</sup>, the 50<sup>th</sup> and the 25<sup>th</sup> percentiles. The vertical lines in the centre of the boxes display the smallest and largest values within 1.5 times the interquartile range below the 25<sup>th</sup> and the 75<sup>th</sup> percentile respectively.

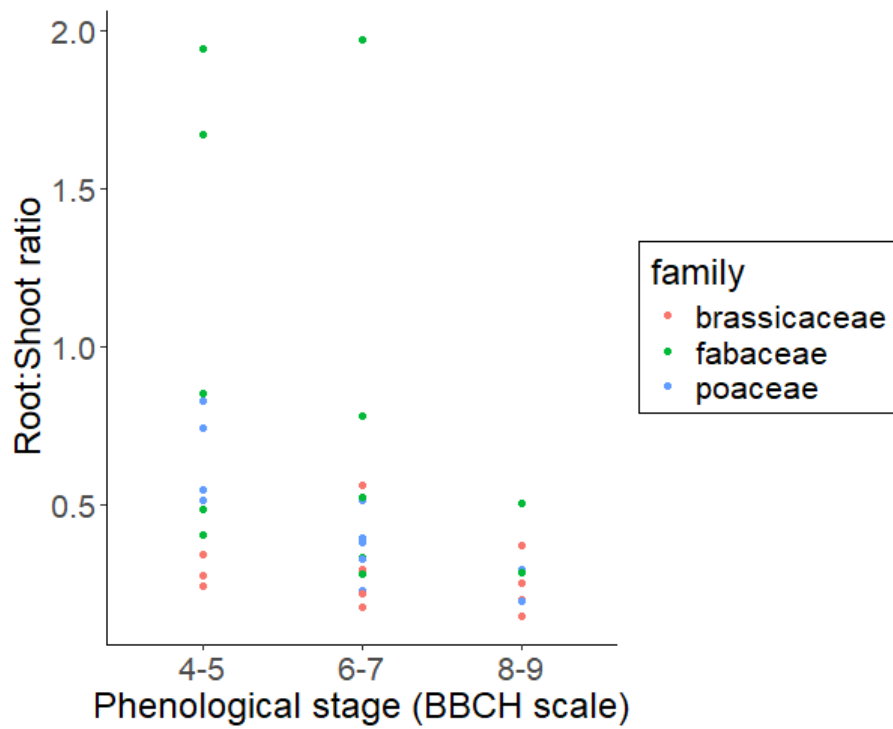

**Figure S5.** Root:Shoot ratio according to the phenological stage in the BBCH scale (Meier, 2003). An anova showed a non significant trend (p-value = 0.08).
